# Supplementary material for: A prognostic model for elderly patients with squamous non-small cell lung cancer: a population-based study
Source: PubMed Central journal article supplement (PMC7670679; doi:10.1186/s12967-020-02606-3), 2020-11-16
Supplement: 12967_2020_2606_MOESM1_ESM.pdf [file 12967_2020_2606_MOESM1_ESM.pdf]

**Table S1 Univariate and multivariate Cox regression analysis based on all variables for overall survival (Training Cohort)**

| Characteristics               | Univariate analysis |         | Multivariate analysis |         |
|-------------------------------|---------------------|---------|-----------------------|---------|
|                               | HR (95% CI)         | P value | HR (95% CI)           | P value |
| <b>Age</b>                    |                     |         |                       |         |
| 60 - 69                       | Reference           |         | Reference             |         |
| 70 - 79                       | 1.115 (1.073-1.159) | <0.001  | 1.106 (1.063-1.150)   | <0.001  |
| ≥ 80                          | 1.562 (1.495-1.633) | <0.001  | 1.224 (1.168-1.283)   | <0.001  |
| <b>Sex</b>                    |                     |         |                       |         |
| Male                          | Reference           |         | Reference             |         |
| Female                        | 0.857 (0.828-0.887) | <0.001  | 0.833 (0.804-0.864)   | <0.001  |
| <b>Race</b>                   |                     |         |                       |         |
| White                         | Reference           |         | Reference             |         |
| Black                         | 1.127 (1.068-1.188) | <0.001  | 0.914 (0.865-0.964)   | 0.001   |
| Asian or Pacific Islander     | 1.097 (1.008-1.195) | 0.033   | 0.853 (0.782-0.930)   | <0.001  |
| American Indian/Alaska Native | 1.147 (0.934-1.410) | 0.191   | 1.080 (0.878-1.327)   | 0.467   |
| <b>Marital</b>                |                     |         |                       |         |
| Married                       | Reference           |         | Reference             |         |
| Unmarried                     | 1.158 (1.119-1.198) | <0.001  | 1.060 (1.022-1.099)   | 0.002   |
| Unknown                       | 1.016 (0.930-1.110) | 0.722   | 0.972 (0.889-1.062)   | 0.526   |
| <b>Site</b>                   |                     |         |                       |         |
| Main bronchus                 | Reference           |         | Reference             |         |
| Upper lobe, lung              | 0.523 (0.485-0.564) | <0.001  | 0.744 (0.688-0.803)   | <0.001  |
| Middle lobe, lung             | 0.526 (0.470-0.588) | <0.001  | 0.786 (0.702-0.880)   | <0.001  |
| Lower lobe, lung              | 0.534 (0.494-0.578) | <0.001  | 0.764 (0.706-0.828)   | <0.001  |
| Overlapping lesion of lung    | 0.548 (0.457-0.657) | <0.001  | 0.828 (0.690-0.994)   | 0.043   |
| Lung, NOS                     | 1.079 (0.977-1.192) | 0.134   | 0.837 (0.755-0.928)   | 0.001   |
| <b>Laterality</b>             |                     |         |                       |         |
| One side                      | Reference           |         | Reference             |         |
| Bilateral                     | 2.422 (2.070-2.833) | <0.001  | 0.975 (0.825-1.152)   | 0.765   |
| <b>Grade</b>                  |                     |         |                       |         |
| I                             | Reference           |         | Reference             |         |
| II                            | 0.889 (0.807-0.979) | 0.017   | 0.945 (0.858-1.040)   | 0.246   |
| III                           | 1.055 (0.960-1.161) | 0.267   | 0.979 (0.890-1.077)   | 0.661   |
| IV                            | 1.210 (0.997-1.470) | 0.054   | 1.070 (0.881-1.300)   | 0.495   |
| <b>AJCC stage</b>             |                     |         |                       |         |
| I                             | Reference           |         | Reference             |         |
| II                            | 1.710 (1.612-1.813) | <0.001  | 1.970 (1.855-2.092)   | <0.001  |
| III                           | 2.855 (2.719-2.999) | <0.001  | 2.746 (2.597-2.903)   | <0.001  |
| IV                            | 5.982 (5.703-6.274) | <0.001  | 4.541 (4.290-4.807)   | <0.001  |
| <b>Surgery</b>                |                     |         |                       |         |
| Yes                           | Reference           |         | Reference             |         |
| No                            | 3.958 (3.800-4.124) | <0.001  | 3.275 (3.106-3.454)   | <0.001  |
| <b>Radiation</b>              |                     |         |                       |         |

|                     |                     |        |                     |        |
|---------------------|---------------------|--------|---------------------|--------|
| Yes                 | Reference           |        | Reference           |        |
| No                  | 0.829 (0.801-0.857) | <0.001 | 1.482 (1.426-1.540) | <0.001 |
| <b>Chemotherapy</b> |                     |        |                     |        |
| Yes                 | Reference           |        | Reference           |        |
| No                  | 0.974 (0.942-1.008) | 0.138  | 1.863 (1.792-1.936) | <0.001 |
| <b>Insurance</b>    |                     |        |                     |        |
| Yes                 | Reference           |        | Reference           |        |
| No                  | 1.236 (1.177-1.297) | <0.001 | 1.063 (1.011-1.118) | 0.016  |

---

AJCC: The American Joint Committee for Cancer

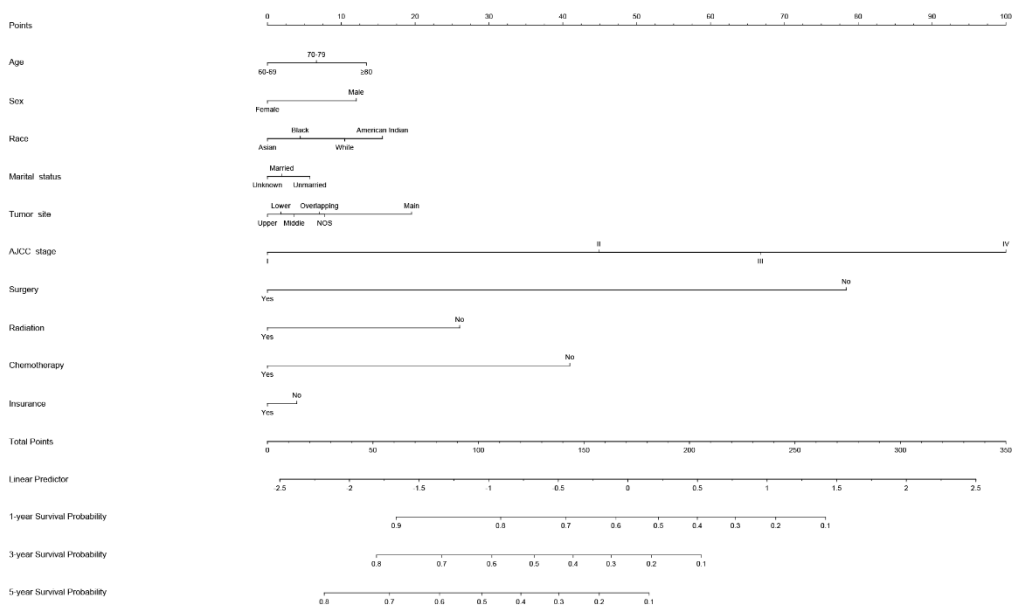

**Figure S1**

**Figure S1** Nomogram predicted 1-, 3- and 5-year overall survival for elderly SCC patients with ten available factors, including age, sex, race, marital status, tumor site, the American Joint Committee for Cancer (AJCC) stage, surgery, radiation, chemotherapy and Insurance.

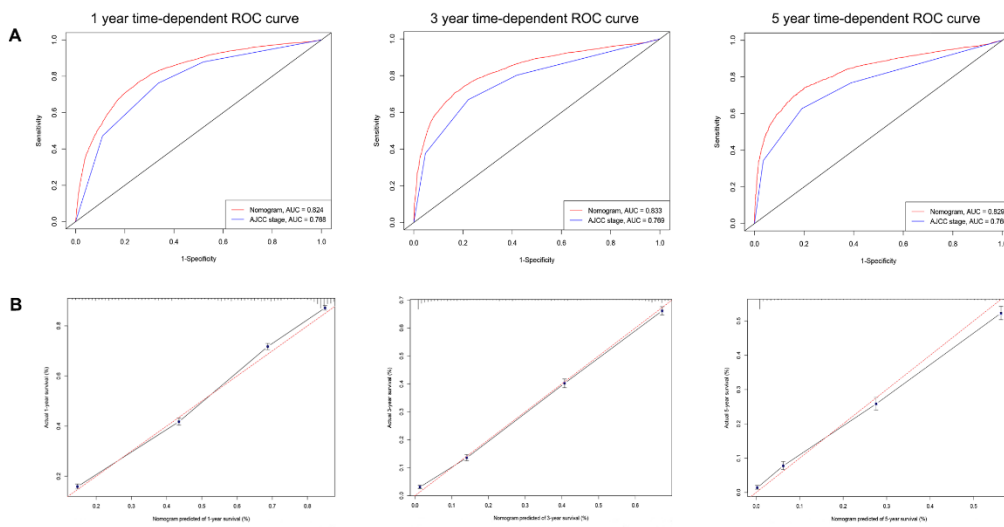

**Figure S2**

**Figure S2** ROC curves and calibration plots for predicting 1-, 3- and 5-year overall survival for elderly SCC patients in the training cohorts. (A) ROC curves of the Nomogram and AJCC stage in prediction of prognosis at 1-, 3- and 5-year point in the training set. (B) The calibration plots for predicting patient survival at 1-, 3- and 5-year point in the training set. ROC: receiver operating characteristic curve; AUC: areas under the ROC curve.

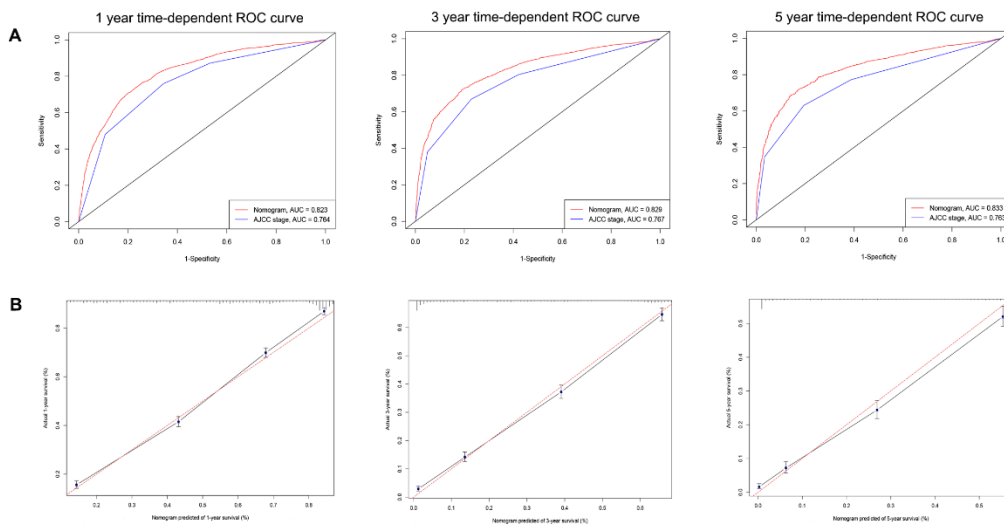

**Figure S3**

**Figure S3** ROC curves and calibration plots for predicting 1-, 3- and 5-year overall survival for elderly SCC patients in the validation cohorts. (A) ROC curves of the Nomogram and AJCC stage in prediction of prognosis at 1-, 3- and 5-year point in the validation set. (B) The calibration plots for predicting patient survival at 1-, 3- and 5-year point in the validation set. ROC: receiver operating characteristic curve; AUC: areas under the ROC curve.

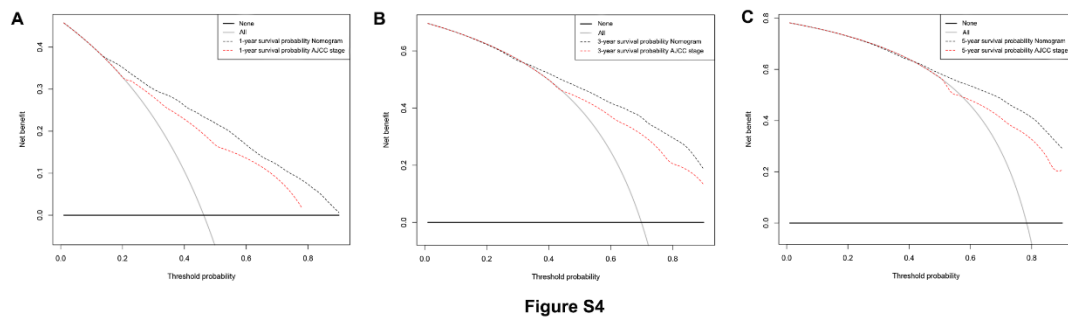

**Figure S4**

**Figure S4** Decision curve analysis for the Nomogram and AJCC stage in prediction of overall survival of elderly SCC patients at 1-year (A), 3-year (B) and 5-year (C) point in the validation cohorts.
